# Supplementary material for: PERIOD–TIMELESS Interval Timer May Require an Additional Feedback Loop
Source: PLOS journal article supplement (doi:10.1371/journal.pcbi.0030154), 2007-07-30
Supplement: S3 (10.1371/journal.pcbi.0030154.s003) [file journal.pcbi.0030154.s003]

| **Mutant** | **Parameter** | **Reference** |
| --- | --- | --- |
| *per01* | *TP*= 0 hr-1 | [1] |
| *tim01* | *TT*= 0 hr-1 | [2] |
| *dbtP, dbtar* | *DP*= 0.1736 hr-1 | [3, 4] |
| *clkJrk* | *TC*= 0 hr-1 | [5] |
| *cyc0* | *kCC*= 0 hr-1 | [6] |
| *pdpP205* | *TD*= 0 hr-1 | [7] |

**References**

1. Baylies MK, Bargiello TA, Jackson FR, Young MW (1987) Changes in abundance or structure of the *per* gene product can alter periodicity of the *Drosophila* clock. Nature 326:390–392.

2. Myers MP, Wager-Smith K, Rothenfluh-Hilfiker A, Young MW (1996) Light-induced degradation of TIMELESS and entrainment of the *Drosophila* circadian clock. Science 271:1736–1740.

3. Price JL, Blau J, Rothenfluh A, Abodeely M, Kloss B, et al. (1998) *double-time* is a novel *Drosophila* clock gene that regulates PERIOD protein accumulation. Cell 94:83–95.

4. Rothenfluh A, Abodeely M, Young MW (2000) Short-period mutations of *per* affect a *double-time*-dependent step in the *Drosophila* circadian clock. Curr Biol 10:1399–1402.

5. Allada R, White NE, So WV, Hall JC, Rosbash M (1998) A mutant *Drosophila* homolog of mammalian *Clock* disrupts circadian rhythms and transcription of *period* and *timeless*. Cell 93:791–804.

6. Rutila JE, Suri V, Le M, So WV, Rosbash M, et al. (1998) CYCLE is a second bHLH-PAS clock protein essential for circadian rhythmicity and transcription of *Drosophila* *period* and *timeless*. Cell 93:805–814.

7. Cyran SA, Buchsbaum AM, Reddy KL, Lin MC, Glossop NR, et al. (2003) *vrille*, *Pdp1*, and *dClock* form a second feedback loop in the *Drosophila* circadian clock. Cell 112:329–341.
